# Supplementary material
Source: PubMed Central journal article supplement (PMC4024880)
Supplement: 1402074111_pnas.201402074SI.pdf [file 1402074111_pnas.201402074SI.pdf]

# Supporting Information

Tang et al. 10.1073/pnas.1402074111

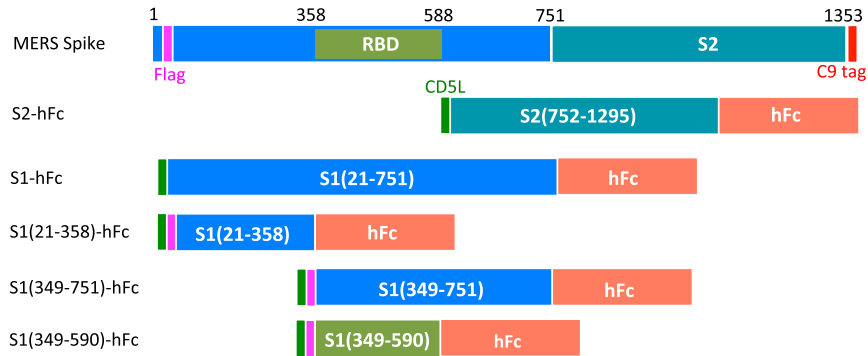

**Fig. S1.** Schematic representation of the Middle East Respiratory Syndrome coronavirus (MERS-CoV) Spike protein (S) and soluble S constructs used in this study. hFc, the hinge-CH2-CH3 of the human IgG1 heavy-chain constant region.

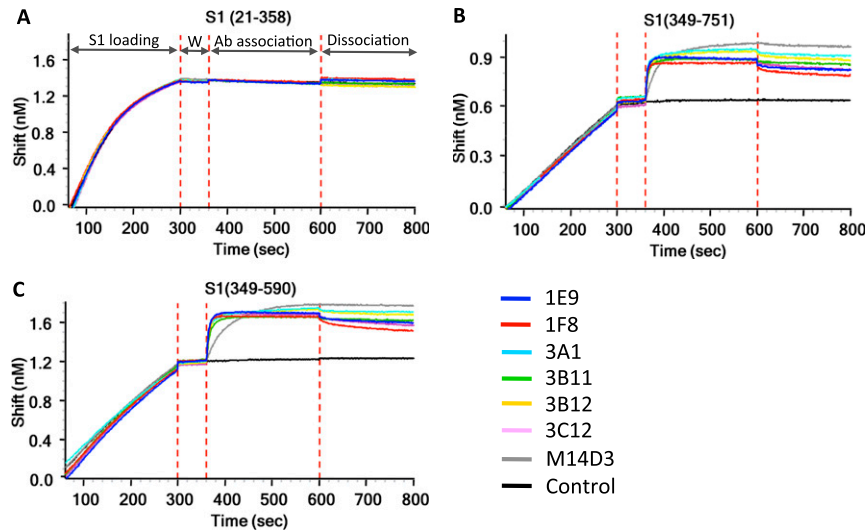

**Fig. S2.** Epitope mapping with three fragments of S1. Anti-Flag biosensors were immobilized with 10  $\mu\text{g}/\text{mL}$  S1(21-358)-hFc (A), S1(349-751)-hFc (B), and S1(349-590)-hFc (C). After washing, each sensor was exposed to 100 nM of each single-chain variable domain fragment/crystallizable fragment (scFvFc). F10 was used as a nonbinding control.

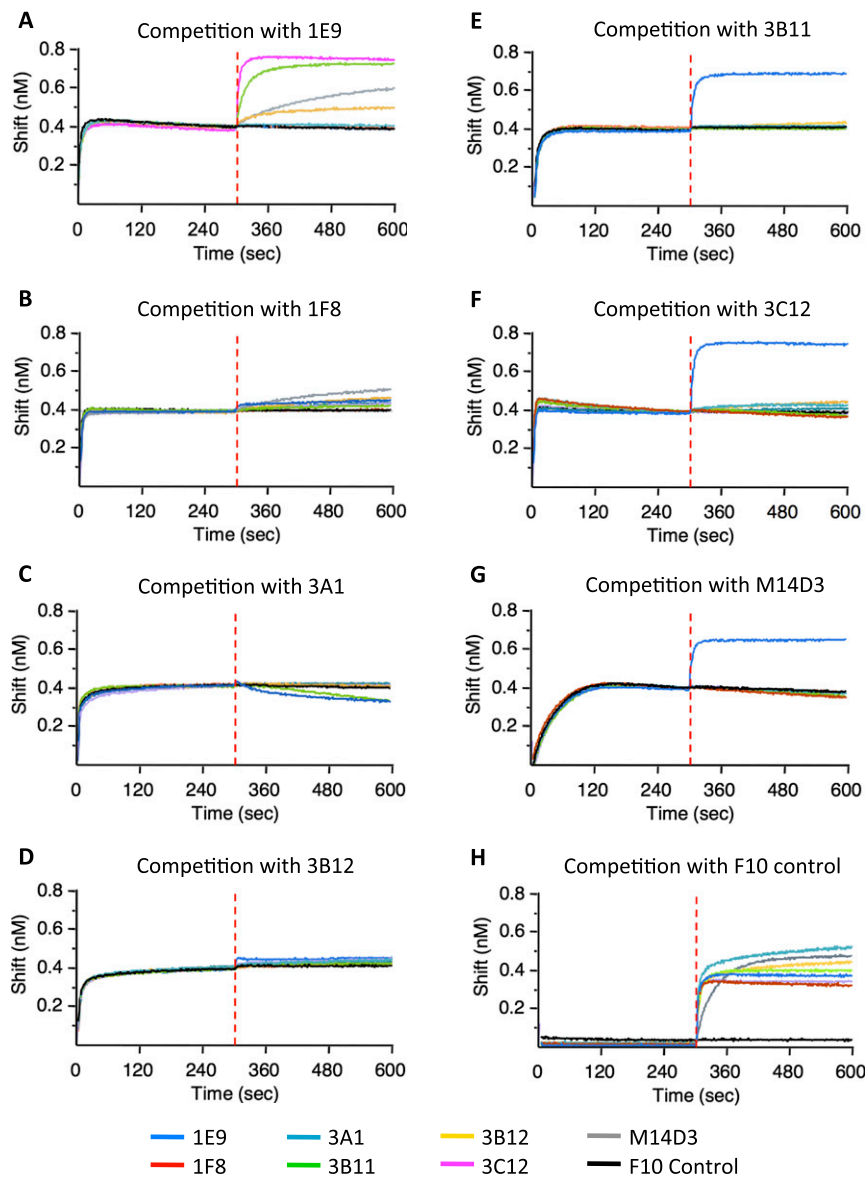

**Fig. S3.** Competition studies among different anti-S1 scFvFc to S1 receptor-binding domain (RBD). Immobilized S1(349–590)-hFc first was saturated with 100 nM of 1E9 (A), 1F8 (B), 3A1 (C), 3B12 (D), 3B11 (E), 3C12 (F), or M14D3 (G) or with the F10 control (1), which recognizes the influenza A stem domain (H) (1). The capacity of an additional anti-S1 scFvFc binding to the sensors was monitored by measuring further shifts after injecting the second anti-S1 scFvFc (100 nM) in the presence of the first scFvFc (100 nM). The red dotted vertical line represents the second scFvFc loading time. F10 was used as a non-S1 binding control.

1. Sui J, et al. (2009) Structural and functional bases for broad-spectrum neutralization of avian and human influenza A viruses. *Nat Struct Mol Biol* 16(3):265–273.

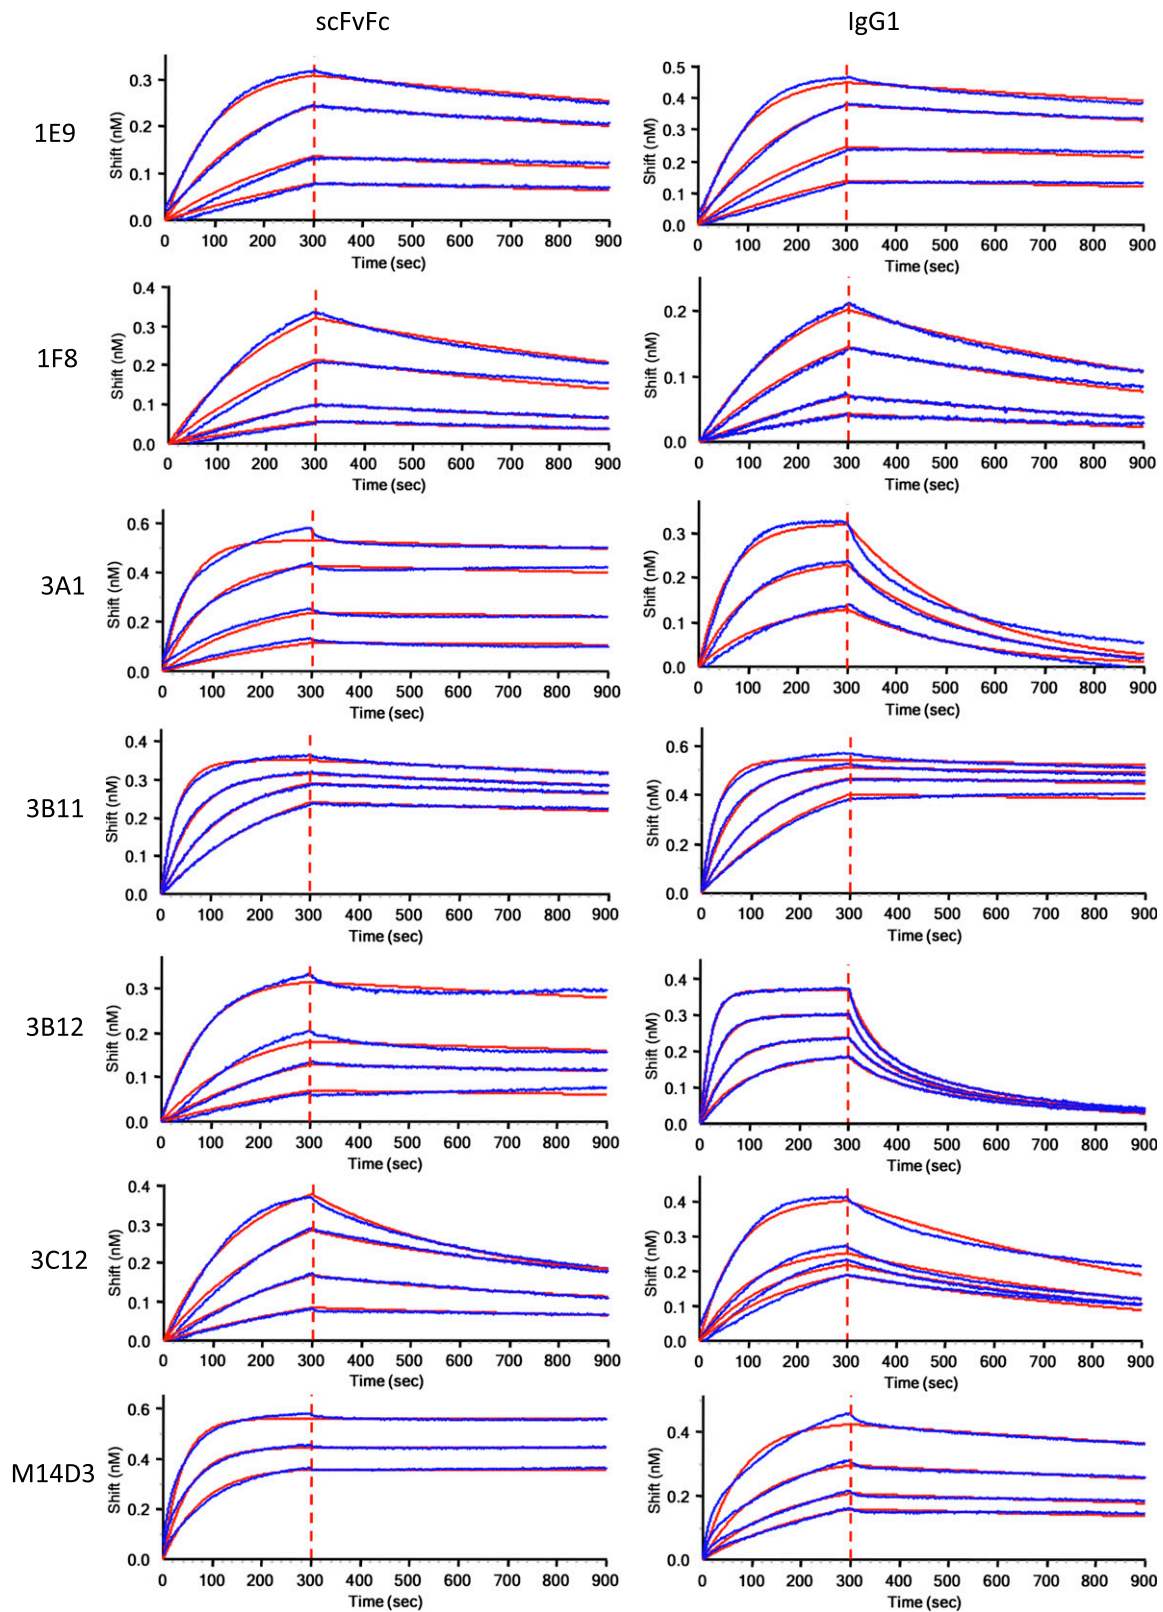

**Fig. S4.** Kinetic characterization of the binding of anti-S1 scFvFc and IgGs to S1(349–590)-hFc. Purified S1(349–590)-hFc was immobilized onto anti-Flag biosensors, and various concentrations of each Ab were injected over the sensor surface. Binding kinetics were evaluated using a 1:1 binding model generated in ForteBio Data Analysis 7.0 software. Blue curves represent the experimental trace, and red curves represent the best global fits for the data used to calculate the  $K_d$ ,  $K_{on}$ , and  $K_{off}$  (summarized in Table 1).

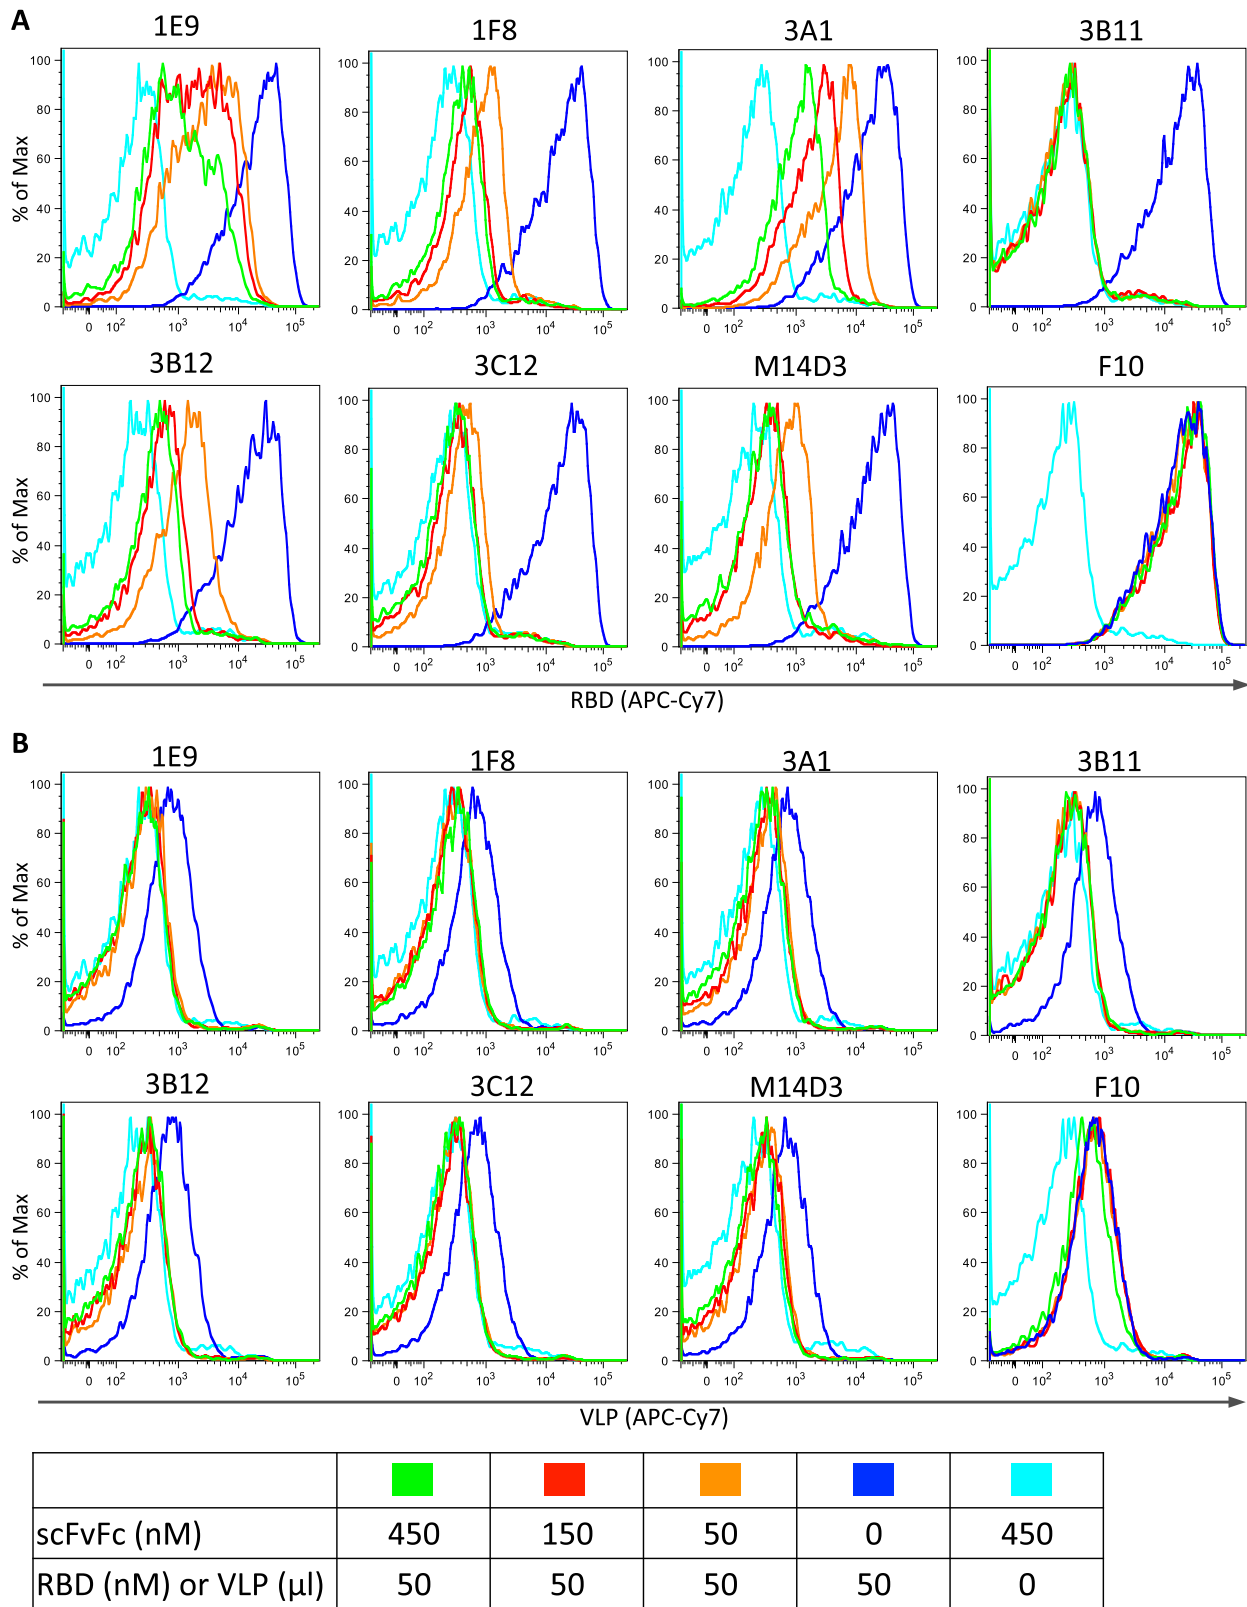

**Fig. S5.** Inhibition of MERS S1-RBD binding to hDPP4-expressing cells by anti-S1 scFvFc. scFvFc Abs (0, 50, 150, or 450 nM) were used to block (A) 50 nM of soluble RBD-hFc or (B) 50  $\mu$ l of MERS-5 pseudotyped lentiviruses (VLP) binding to the 293T-hDPP4 cells. Binding was analyzed by flow cytometry. Each Ab is specified above its histogram. The color key for the Ab concentrations is given at the bottom of the figure.

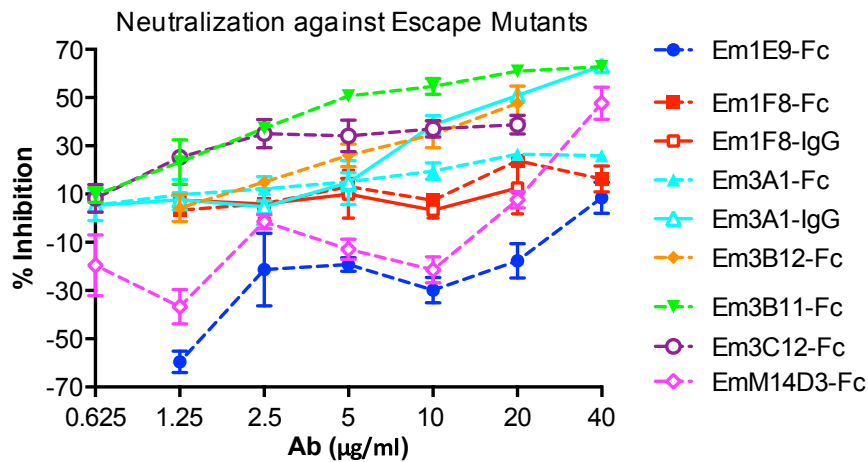

**Fig. S6.** The plaque reduction neutralization test (PRNT<sub>50</sub>) assay for escape mutant viruses against their selecting Abs. Abs were diluted in PBS (2× serial dilutions, starting at 40 µg/mL) and were used to block infection with 100 pfu of escape mutant MERS-CoV in Vero cells. Virus with no Abs was used as control. Plaques formed in each dilution were counted 48–72 h postinfection.

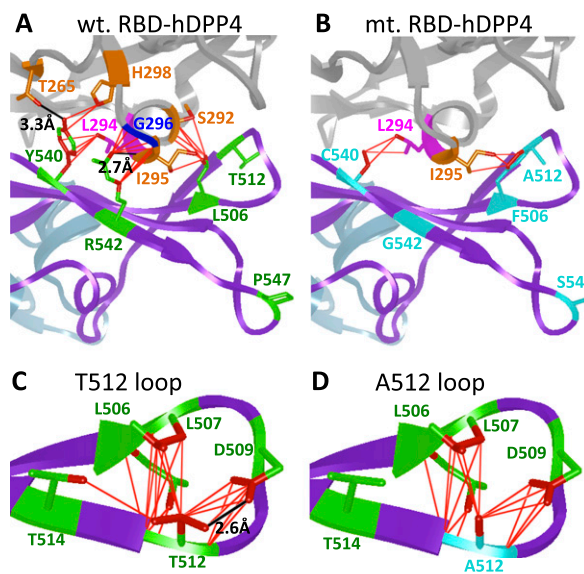

**Fig. S7.** Structural details of the interfaces between human dipeptidyl peptidase 4 (hDPP4) and MERS S wild-type or mutant RBDs. The interface structure was adapted from PDB ID code 4KR0, with hDPP4 displayed in gray and the Spike RBD represented as the receptor-binding motif in purple and the receptor-binding core in light blue. Five escape mutation residues are indicated in green before mutation (A and C) and in cyan after mutation (B and D). The hDPP4 residues 265, 292, 294–296, and 298 in contact with the mutations in RBD are labeled. The van der Waals (VDW) interactions are shown as red lines. Hydrogen bonds at S7A and S7C are shown as black lines.

**Table S1. Abs' IC<sub>50</sub> against wild-type and escape mutant virus**

| Selecting Ab | Escape mutation  |               | IC <sub>50</sub> , µg/mL |          |
|--------------|------------------|---------------|--------------------------|----------|
|              | Nucleotide       | Amino acid    | Wild type                | Mutation |
| 1E9-Fc       | C23089U          | P547S         | 3.21                     | >40      |
| 1F8-Fc       | A23074G          | R542G         | 6.27                     | >40      |
| 1F8-IgG      | G23076C, U25136C | R542S; I1229T | 4.05                     | >40      |
| 3A1-Fc       | G23075C/U        | R542T         | 1.46                     | >40      |
| 3A1-IgG      | G23075A          | R542K         | 4.50                     | 20       |
| 3B12-Fc      | A22984G, C22966U | L506F, T512A  | 1.25                     | >20      |
| M14D3-Fc     | G23075A          | R542K         | 4.30                     | >40      |
| 3B11-Fc      | A23069G, C22966U | L506F, Y540C  | 1.83                     | 6.76     |
| 3B11-IgG     | NA               | NA            | 3.50                     | NA       |
| 3C12-Fc      | U23068C          | Y540H         | 2.00                     | >40      |

NA, not available because no escape mutant was isolated from 3B11-IgG.

**Table S2.  $K_d$  values of RBD mutants binding to the scFvFc<sub>s</sub> and hDPP4 ( $10^{-10}$  M)**

| RBD mutant    | Selecting Ab    | 1E9         | 1F8         | 3A1         | 3B12        | 3B11        | 3C12        | M14D3       | hDPP4      |
|---------------|-----------------|-------------|-------------|-------------|-------------|-------------|-------------|-------------|------------|
| L506F         | 3B11, 3B12      | 2.15 (0.52) | 10.8 (0.68) | 2.61 (1.16) | 6.42 (3.65) | 3.30 (2.44) | 15.1 (0.75) | 3.62 (7.7)  | 307 (1.43) |
| T512A         | 3B12            | —           | —           | —           | —           | —           | —           | —           | —          |
| Y540C         | 3B11, 3C12      | 4.49 (1.09) | —           | —           | —           | —           | —           | —           | —          |
| R542G         | 1F8, 3A1, M14D3 | —           | —           | —           | —           | —           | —           | —           | —          |
| P547S         | 1E9             | —           | 23.7 (1.5)  | 6.27 (2.79) | 9.26 (5.26) | 1.70 (1.26) | 19.5 (0.97) | 1.68 (3.57) | 182 (0.85) |
| L506F, T512A  | 3B12            | —           | —           | —           | —           | —           | —           | —           | —          |
| L506F, Y540C  | 3B11            | 3.80 (0.92) | —           | —           | —           | —           | —           | —           | —          |
| Wild-type RBD |                 | 4.13        | 15.8        | 2.25        | 1.76        | 1.35        | 20.1        | 0.47        | 214        |

Numbers in parentheses are  $K_d$  ratios divided by  $K_d$  of Ab or hDPP4 binding to wild-type RBD. —, undetectable.

**Table S3.  $IC_{50}$  for neutralization of selected neutralizing Ab escape mutant viruses ( $\mu\text{g/mL}$ )**

| Ab      | Em1E9-Fc (group 1) | Em1F8-Fc (group 2) | Em3B11-Fc (group 3) | Em3C12-Fc (group 3) |
|---------|--------------------|--------------------|---------------------|---------------------|
| 1E9-Fc  | >40                | <0.625             | 0.84                | <0.625              |
| 1F8-Fc  | 12.8               | >40                | 11.2                | >40                 |
| 3B11-Fc | 1.50               | 0.88               | 6.76                | 8.94                |
| 3C12-Fc | <0.625             | 11.7               | 13.8                | >40                 |

**Table S4. Contact change between five key RBD residues and neighboring amino acids (distance  $\leq 5.0$  Å) before and after mutation**

| Wild-type RBD | VDW contact | Mutant RBD | VDW contact |
|---------------|-------------|------------|-------------|
| With hDPP4    |             |            |             |
| L506          | 7           | F506       | 3           |
| T512          | 0           | A512       | 0           |
| Y540          | 7           | C540       | 3           |
| R542          | 11          | G542       | 0           |
| P547          | 0           | S547       | 0           |
| Within RBD    |             |            |             |
| T512          | 20          | A512       | 15          |

Detailed contacts are shown in Fig. S7.
